# Supplementary material
Source: publisher figshare collection journal article supplement (https://diabetesjournals.figshare.com/ndownloader/files/24693524)
Supplement: Supplementary file 1 [file 24693524]

## Supplementary material

### Supplementary Figure 1

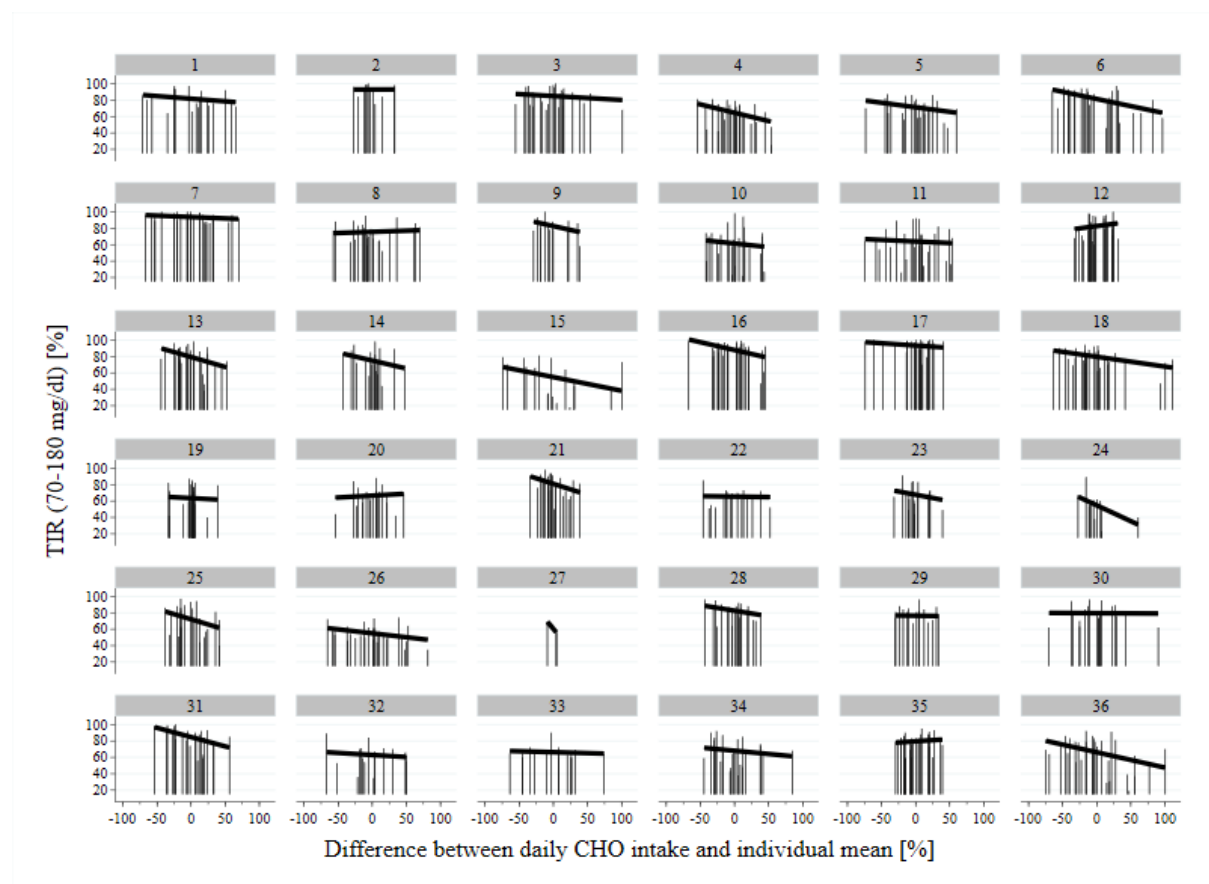

**Supplementary Figure 1:** Plot of difference between daily carbohydrate (CHO) intake and individual mean CHO intake (over study period), and related time in range (TIR, 70-180 mg/dL) for each individual (n=36). Bold line depicts the corresponding linear association for each individual. TIR, time in range (%); CHO, carbohydrate.
